# Supplementary material
Source: PubMed Central journal article supplement (PMC6097922)
Supplement: NIHMS949204-supplement.pdf [file NIHMS949204-supplement.pdf]

**eTable 1.** Population characteristics of participants without olfaction assessed, ARIC visit 5 (2011-2013, n=440)

**eTable 2.** Prevalence of MCI across the continuous smell test scores, ARIC visit 5 (2011-2013, n=5,021)

**eFigure 1.** Adjusted mean memory factor score (95% confidence interval), across continuous smell test scores, ARIC visit 5 (2011-2013, n=5,021)

**eFigure 2.** Adjusted mean language factor score (95% confidence interval), across continuous smell test scores, ARIC visit 5 (2011-2013, n=5,021)

**eFigure 3.** Adjusted mean executive function/processing speed factor score (95% confidence interval), across continuous smell test scores, ARIC visit 5 (2011-2013, n=5,021)

**eFigure 4.** Adjusted prevalence ratio of MCI (95% confidence interval), across continuous smell test scores, ARIC visit 5 (2011-2013, n=5,021)

**Supplemental Table 1. Population Characteristics of participants without olfaction assessed, ARIC visit 5 (2011-2013, n=440)**

| <b>Characteristics</b>                                                | <b>Olfaction not assessed</b> |
|-----------------------------------------------------------------------|-------------------------------|
| <b>Age, years, mean (SD)</b>                                          | 78.6 (5.6)                    |
| <b>Female sex, n (%)</b>                                              | 272 (61.8)                    |
| <b>Black Race, n (%)</b>                                              | 144 (32.7)                    |
| <b>&lt; High School Education, n (%)</b>                              | 104 (23.6)                    |
| <b>Diabetes, n (%)</b>                                                | 104 (30.7)                    |
| <b>Hypertension, n (%)</b>                                            | 327 (81.3)                    |
| <b>Prevalent stroke, n (%)</b>                                        | 37 (8.4)                      |
| <b>Ever smoker, n (%)</b>                                             | 161 (58.1)                    |
| <b>ApoE4 allele <math>\geq</math> 1, n (%)</b>                        | 171 (38.9)                    |
| <b>Memory factor score, mean (SD)</b>                                 | -2.38 (0.81)                  |
| <b>Language factor score, mean (SD)</b>                               | -0.50 (0.80)                  |
| <b>Executive functioning/processing speed factor score, mean (SD)</b> | -0.65 (0.34)                  |
| <b>Global cognitive function factor score, mean (SD)</b>              | -1.16 (0.83)                  |

**Supplemental Table 2. Prevalence of MCI across the continuous smell test scores, ARIC visit 5 (2011-2013, n=5,021)**

| <b>Smell Test Score</b> | <b>Sample Size</b> | <b># MCI Cases (%)</b> |
|-------------------------|--------------------|------------------------|
| <b>0</b>                | 13                 | 7 (53.8)               |
| <b>1</b>                | 22                 | 13 (59.1)              |
| <b>2</b>                | 34                 | 14 (41.2)              |
| <b>3</b>                | 56                 | 24 (42.9)              |
| <b>4</b>                | 91                 | 24 (26.4)              |
| <b>5</b>                | 159                | 58 (36.5)              |
| <b>6</b>                | 199                | 64 (32.2)              |
| <b>7</b>                | 331                | 96 (29.0)              |
| <b>8</b>                | 486                | 156 (32.1)             |
| <b>9</b>                | 695                | 160 (23.0)             |
| <b>10</b>               | 1014               | 199 (19.6)             |
| <b>11</b>               | 1163               | 183 (15.7)             |
| <b>12</b>               | 758                | 94 (12.4)              |
| <b>Analytic sample</b>  | 5,021              | 1,092 (21.7)           |

Supplemental Figure 1. Adjusted mean memory factor score (95% confidence interval), across continuous smell test scores, ARIC visit 5 (2011-2013, n=5,021)

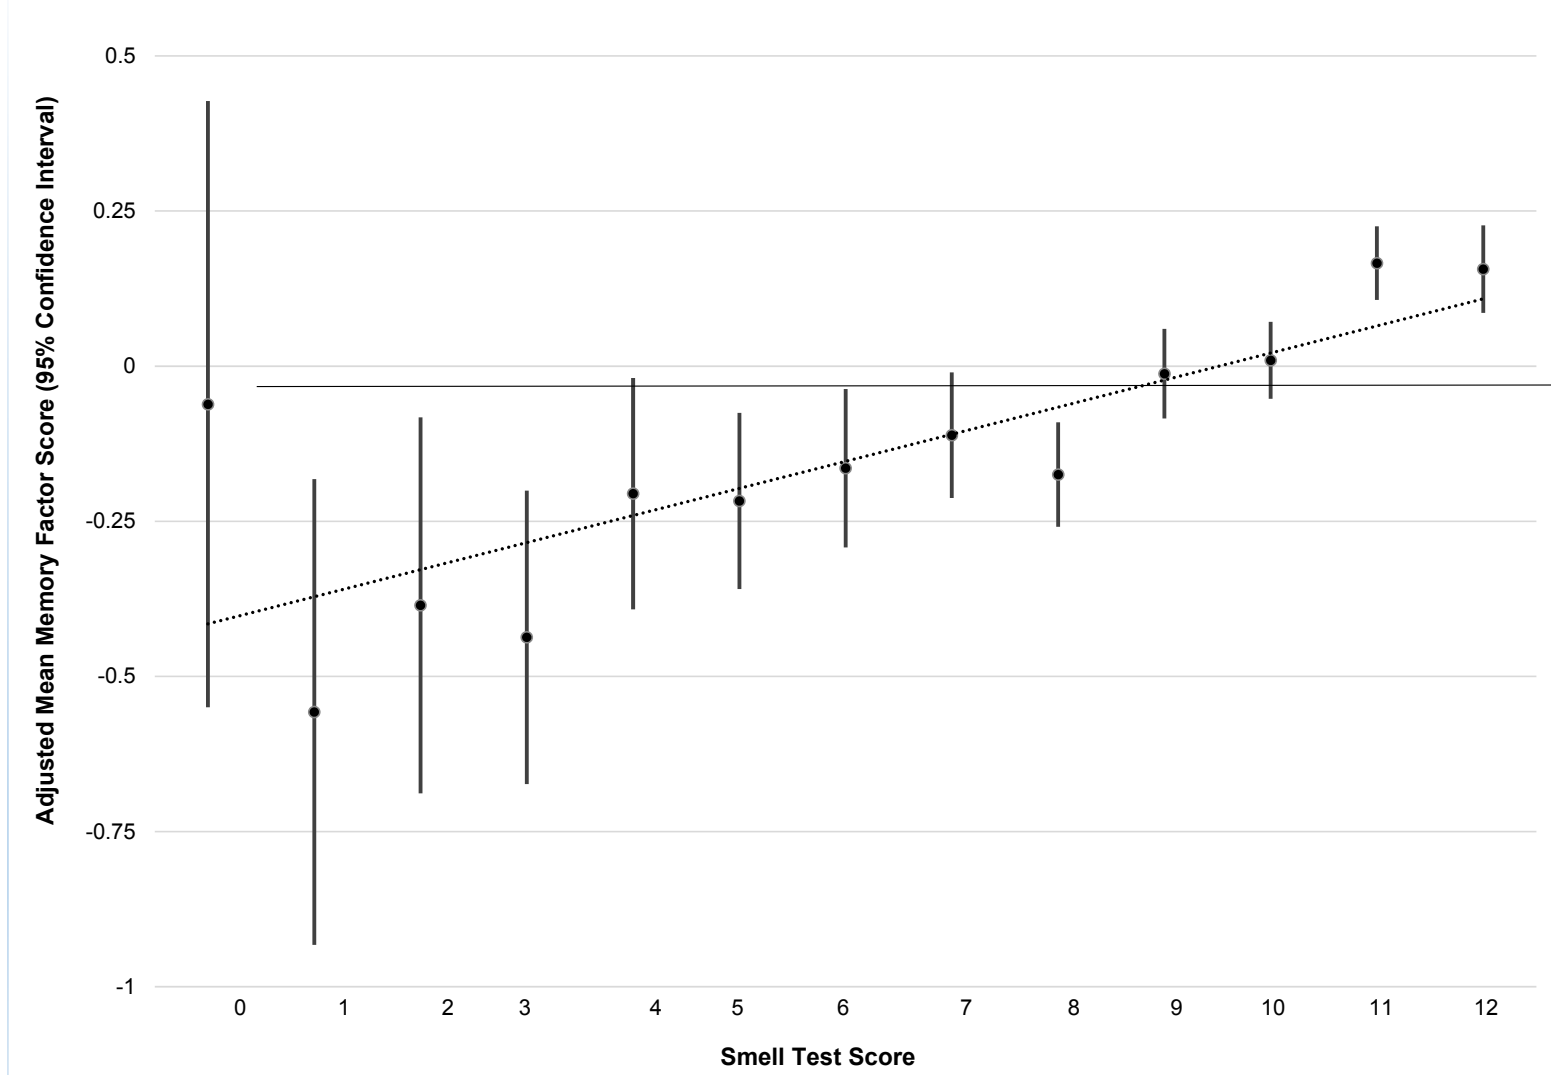

Adjusted for age, sex, education, race-field center, ApoE4, ever smoker status

Supplemental Figure 2. Adjusted mean language factor score (95% confidence interval), across continuous smell test scores, ARIC visit 5 (2011-2013, n=5,021)

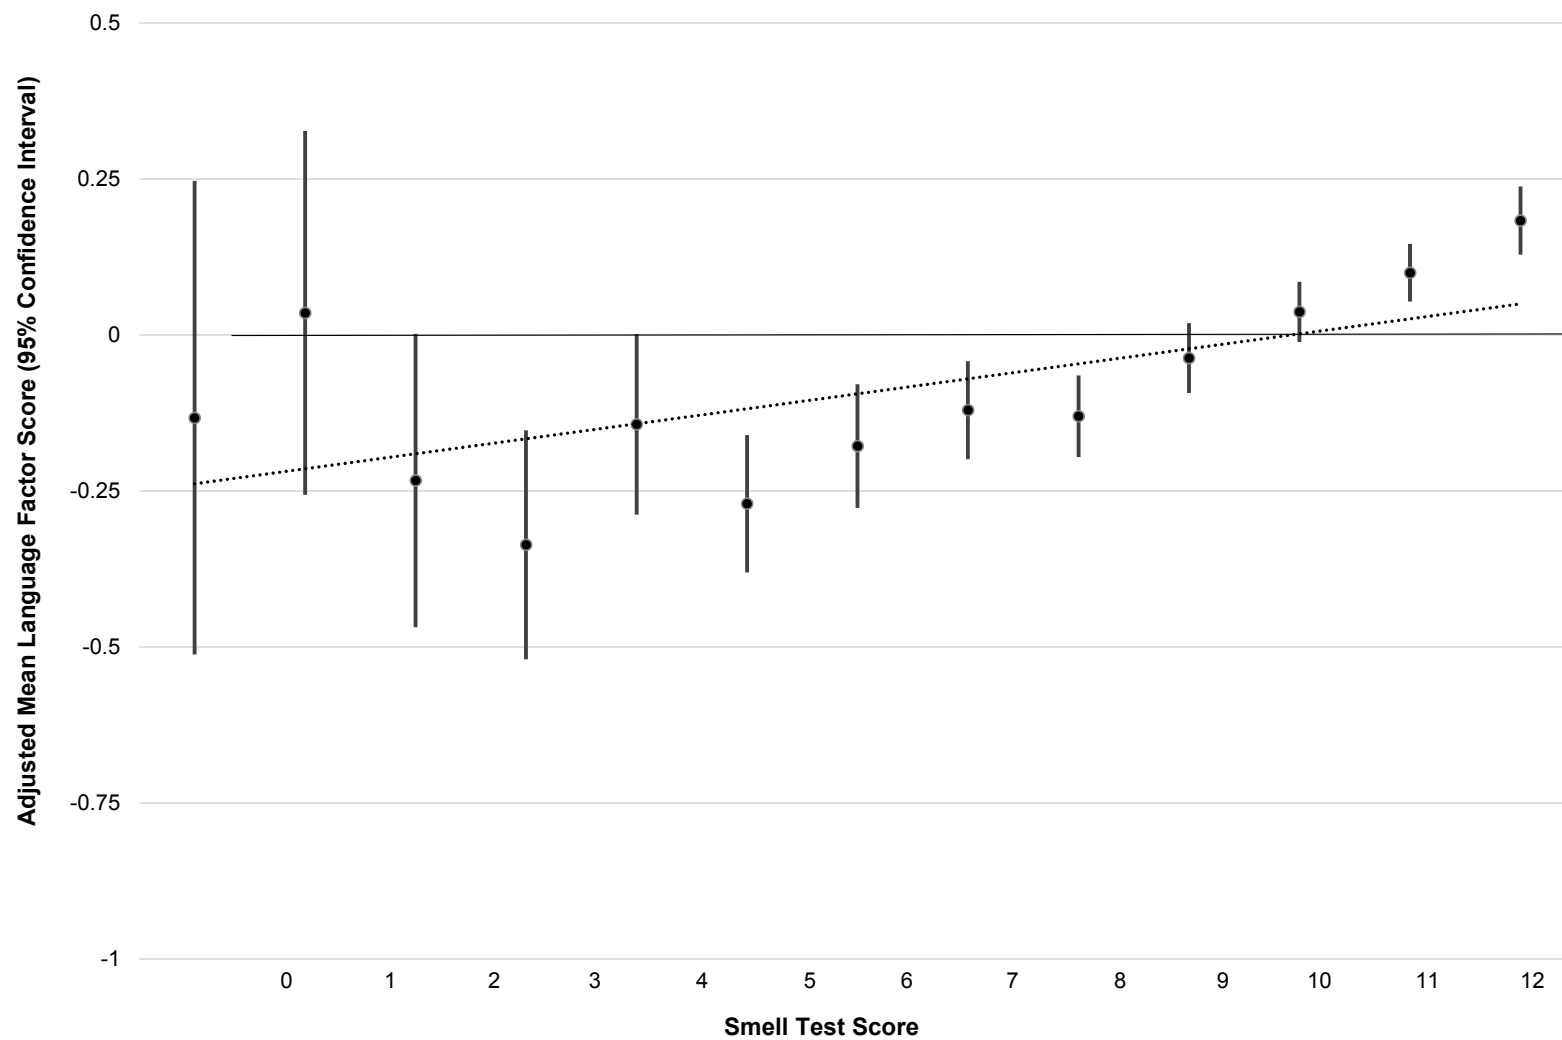

Adjusted for age, sex, education, race-field center, ApoE4, ever smoker status

**Supplemental Figure 3. Adjusted mean executive function/processing speed factor score (95% confidence interval), across continuous smell test scores, ARIC visit 5 (2011-2013, n=5,021)**

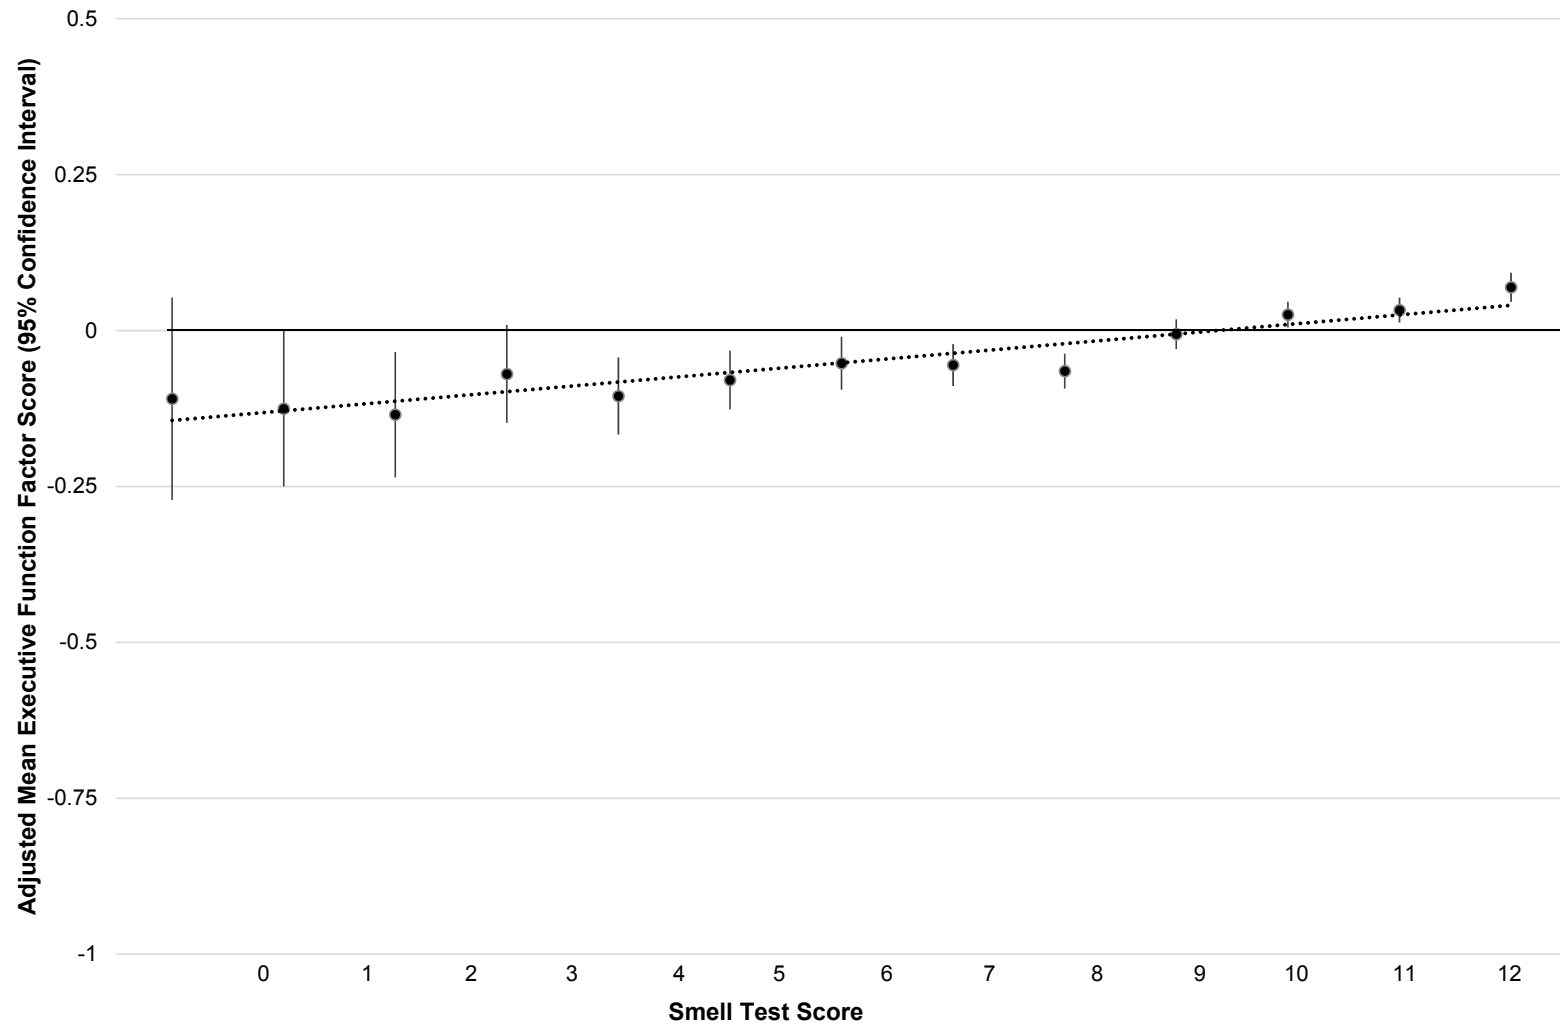

Adjusted for age, sex, education, race-field center, ApoE4, ever smoker status

Supplemental Figure 4. Adjusted prevalence ratio of MCI (95% confidence interval), across smell test scores (0-12), ARIC visit 5 (2011-2013, n=5,021)

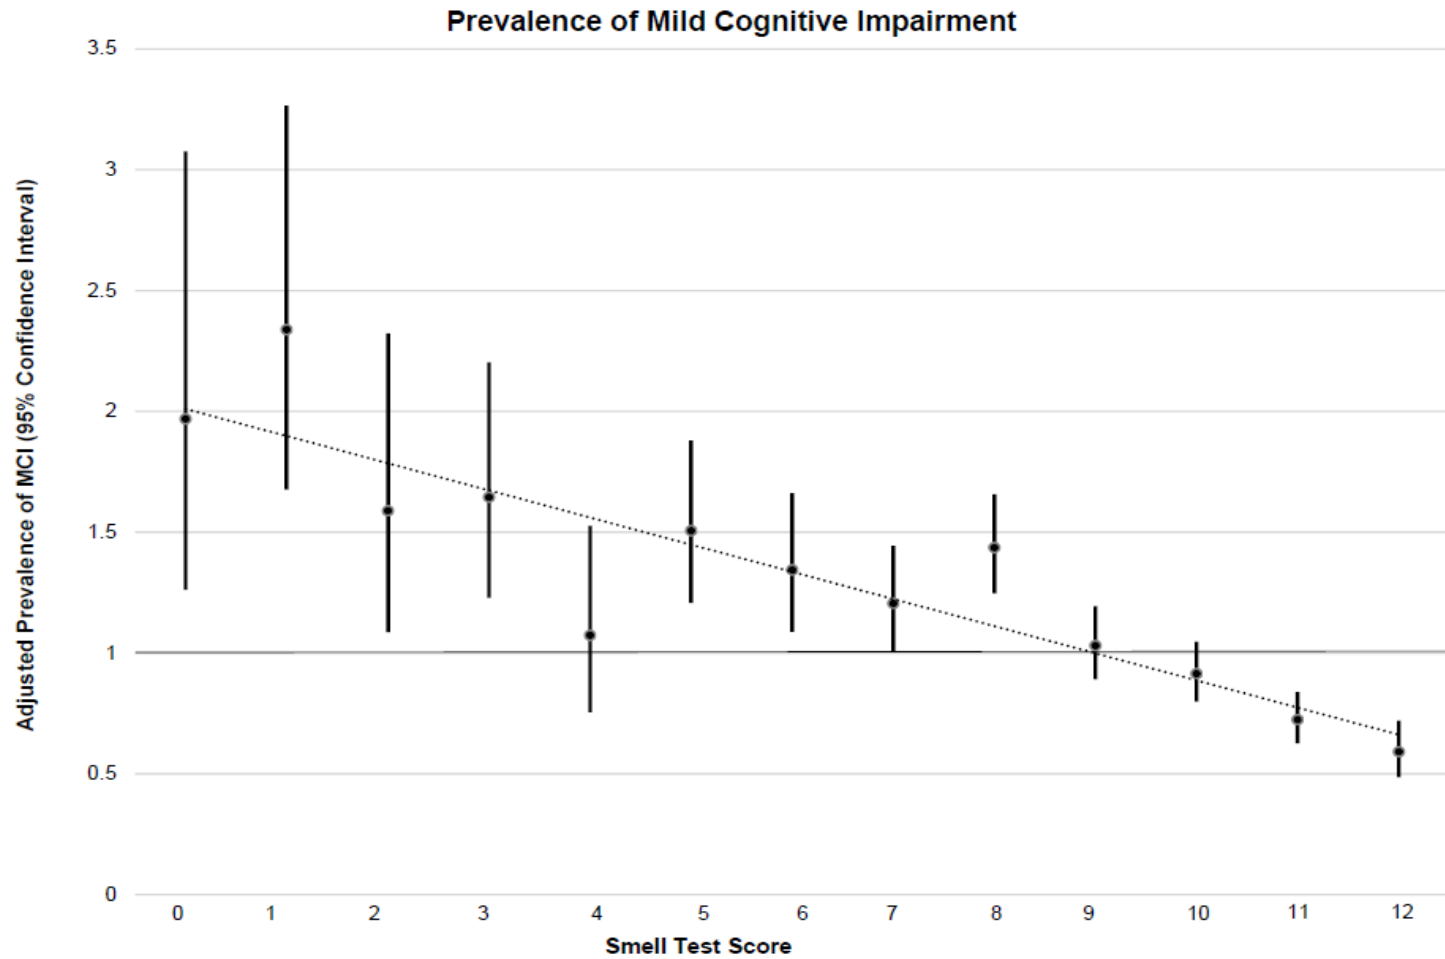

Adjusted for age, sex, education, race-field center, APOE ε4, ever smoker status  
p-trend<0.05
